# Supplementary material for: Deciphering the Role of Schwann Cells in Inflammatory Peripheral Neuropathies Post Alphavirus Infection
Source: MDPI journal article supplement (doi:10.3390/cells12010100), 2022-12-26
Supplement: s1 [file s1]

## Supporting information legends:

**Figure S1. The infection and expression of high levels of capsid viral protein following CHIKV infection and comparing Schwann cells together with fibroblast-like synoviocytes.** Cells cultured on coverslips were either mock infected or infected with different multiplicity of infection (MOI  $10^{-1}$  to  $10^{-4}$ ) for 24h. After several washes in PBS, cells were fixed with ethanol (90%) prior to immunostaining with rabbit anti-capsid followed by secondary Donkey anti-Rabbit conjugated to Alexa 594 (Red). Nuclei were counterstained with DAPI (blue). Fluorescence imaging was carried out using Nikon fluorescence microscope. (mag x 200)

**Figure S2. ONNV induces SC cytotoxicity at 48 h.** SC were infected with ONNV (from MOI  $10^{-3}$  to 1) or exposed to stimulatory treatments (PIC 10  $\mu\text{g/mL}$ , IL-1 $\beta$  10 ng/mL, TNF- $\alpha$  10 ng/mL, TGF- $\beta$ 2 10 ng/mL and ATP 1 mM) for 48 h. Cytotoxicity was monitored by measuring percentage of LDH released in culture supernatant. Results are from 3 independent experiments. \*: p-values  $\leq 0.05$ , \*\*: p-values  $\leq 0.01$  and \*\*\*: p-values  $\leq 0.001$  represent significant difference from controls (CT) by one-way ANOVA followed by the Bonferroni's test analysis.

**Figure S3. ONNV does not increase CCL2 and CXCL8 proinflammatory chemokine production at 30 h post-infection.** SC were infected with ONNV (from MOI  $10^{-3}$  to 1) or exposed to PIC 10  $\mu\text{g/mL}$ . Supernatants were harvested after 30 h and levels of CCL2 and CXCL8 were measured by ELISA assay. All experiments were done in triplicates and results are expressed as mean  $\pm$  standard error. \*: p-values  $\leq 0.05$ , \*\*: p-values  $\leq 0.01$ , \*\*\*: p-values  $\leq 0.001$  and \*\*\*\*: p-values  $\leq 0.0001$  represent significant difference from controls by one-way ANOVA followed by the Bonferroni's test analysis.

**Figure S4. ONNV infection enhances the PGE2- synthesizing enzyme PGES detection in SC.** SC were cultured on coverslips, incubated with ONNV (MOI 1) for 24 h or mock infected (CT) and analyzed by fluorescence microscopy. Immunostaining using rabbit anti-CHIKV capsid and Alexa Fluor 594 (red)-conjugated donkey anti-rabbit or Alexa Fluor 488(green)-conjugated mouse anti-PGES. Nuclei were counterstained with DAPI (blue).

**Figure S5. SC modulate prostaglandin E2- biosynthesis pathway in response to the proinflammatory cytokines IL-1 $\beta$  and TNF- $\alpha$  stimulations.** cPLA2 $\alpha$  (a), mPGES-1 (b), COX-2 (c) and 15-PGDH (d) mRNA levels were evaluated by qRT-PCR in SC exposed to stimulatory treatments (IL-1 $\beta$  10 ng/mL, TNF- $\alpha$  10 ng/mL, TGF- $\beta$ 2 10 ng/mL and ATP 1 mM) for 6 h and 24 h. All experiments were done in triplicates. Results are expressed as mean  $\pm$  SEM and presented as normalized fold increase vs control. \*: p-values  $\leq$  0.05, \*\*: p-values  $\leq$  0.01 and \*\*\*: p-values  $\leq$  0.001 represent significant difference from controls by one-way ANOVA followed by the Bonferroni's test analysis.
