# Supplementary material for: Deciphering the Role of Schwann Cells in Inflammatory Peripheral Neuropathies Post Alphavirus Infection
Source: MDPI journal article supplement (doi:10.3390/cells12010100), 2022-12-26
Supplement: s1 [file s1]

***Primary human Schwann cells p5:***

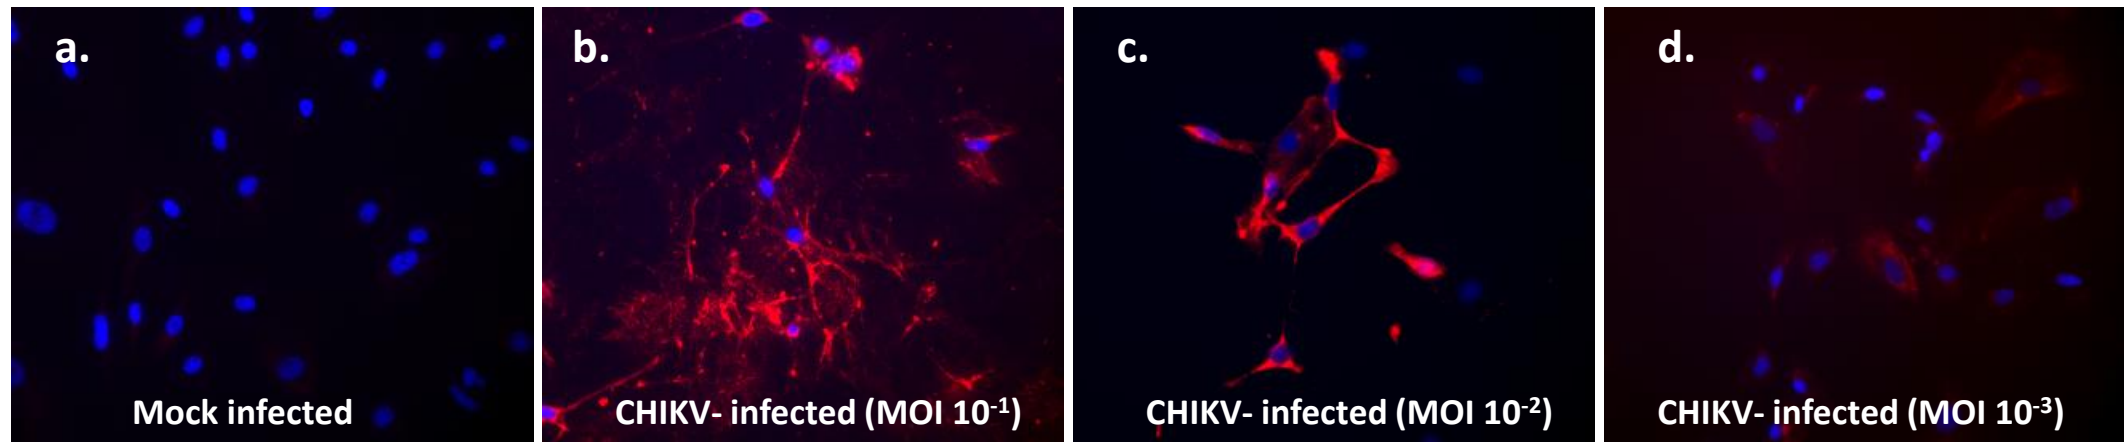

***Primary human Fibroblast-like Synoviocytes p4:***

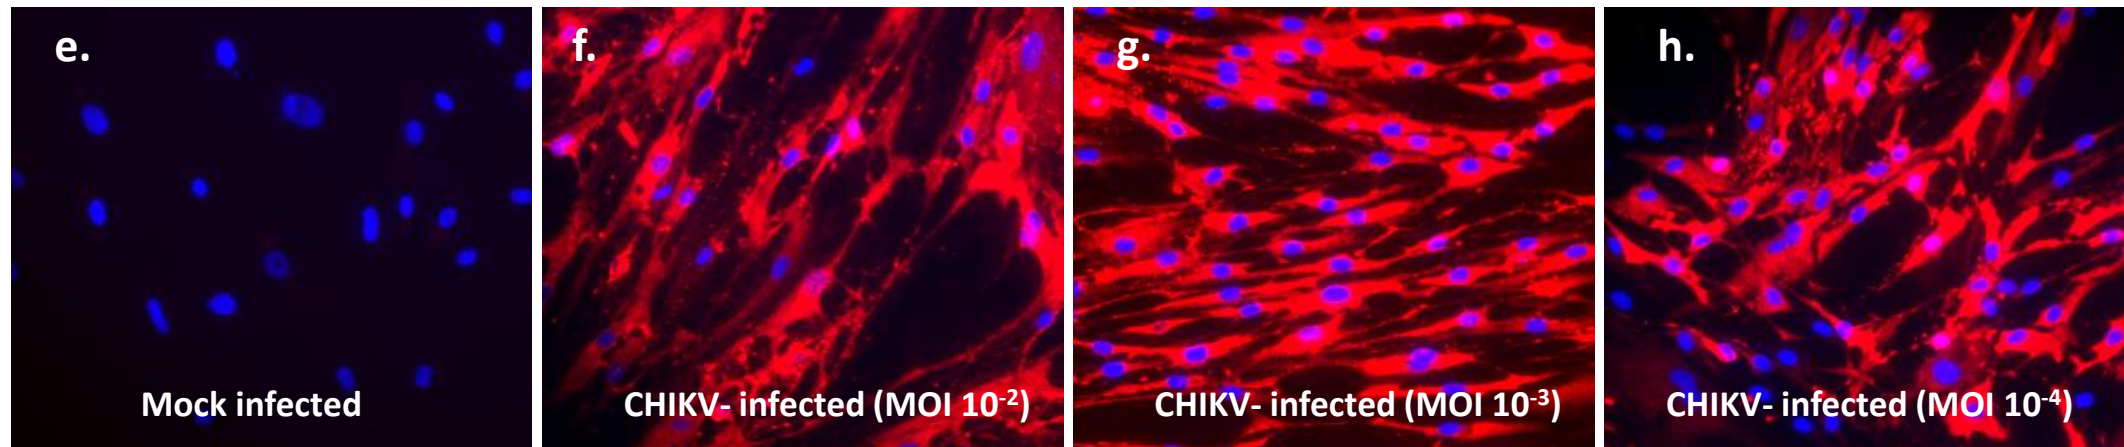

- **Supplemental figure S1:** Cells cultured on coverslips were either mockinfected or infected with different multiplicity of infection (MOI  $10^{-1}$  to  $10^{-4}$ ) for 24h. After several washes in PBS, cells were fixed with ethanol (90%) prior to immunostaining with rabbit anti-capsid followed by secondary Donkey anti-Rabbit conjugated to Alexa 594 (Red). Nuclei were counterstained with DAPI (blue). Fluorescence imaging was carried out using Nikon fluorescence microscope. (mag x 200)
