# Supplementary material for: Deciphering the Role of Schwann Cells in Inflammatory Peripheral Neuropathies Post Alphavirus Infection
Source: Cells. 2022 Dec 26;12(1):100. doi: 10.3390/cells12010100 (PMC9916230; doi:10.3390/cells12010100)
Supplement: Supplementary file 1 [file cells-12-00100-s001.zip]

Archive with 6 entries (6 files):
- cells-1842806-supplementary.pdf
- Figure S1 oct2022.pdf
- Figure S2 oct2022.pdf
- Figure S3 oct2022.pdf
- Figure S4 oct2022.pdf
- Figure S5 oct2022.pdf
