# Supplementary figures and images for: Deciphering the Role of Schwann Cells in Inflammatory Peripheral Neuropathies Post Alphavirus Infection
Source: MDPI journal article supplement (doi:10.3390/cells12010100), 2022-12-26

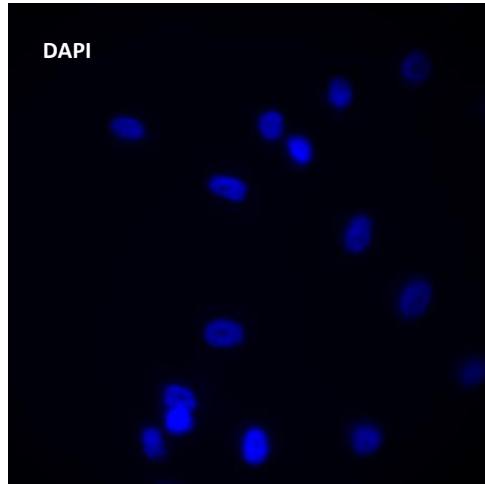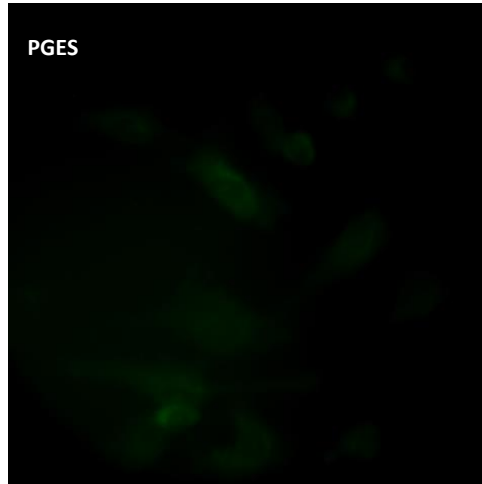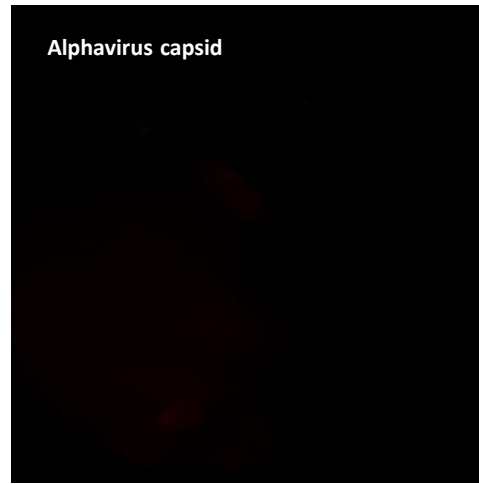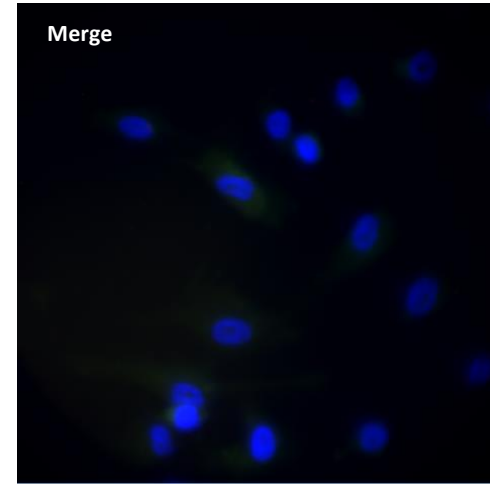

CT

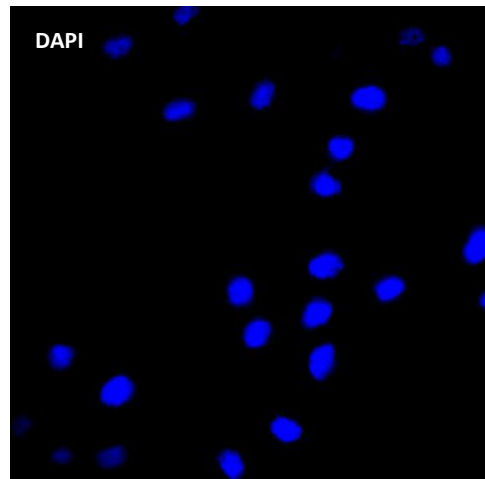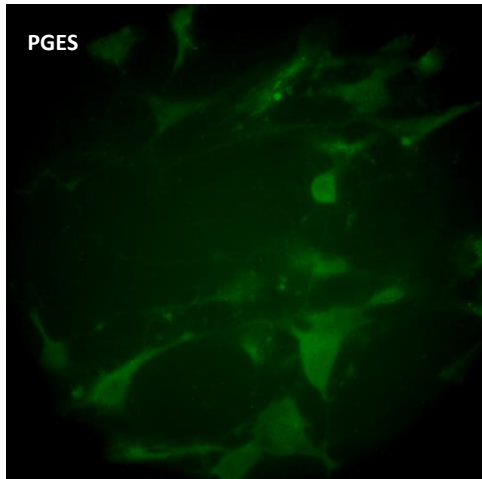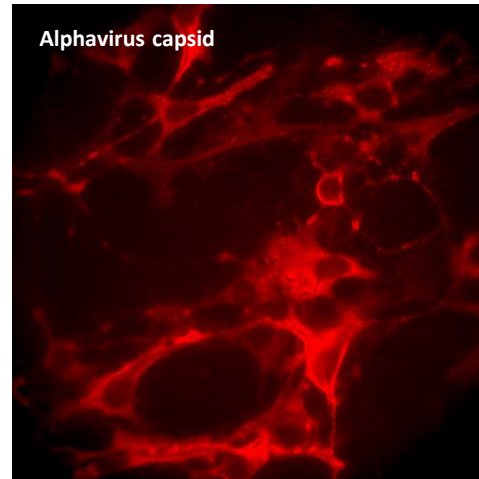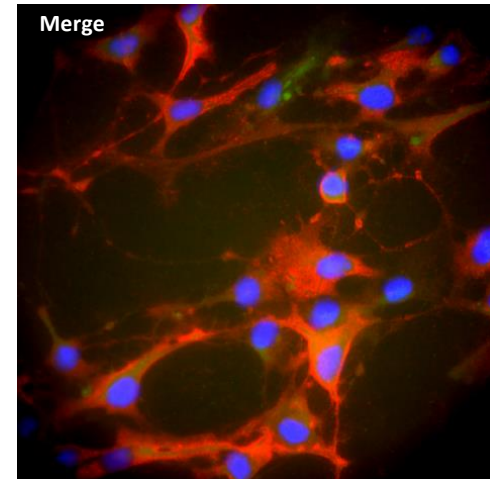

ONNV  
MOI 1

Supplement: s1 [file s1]

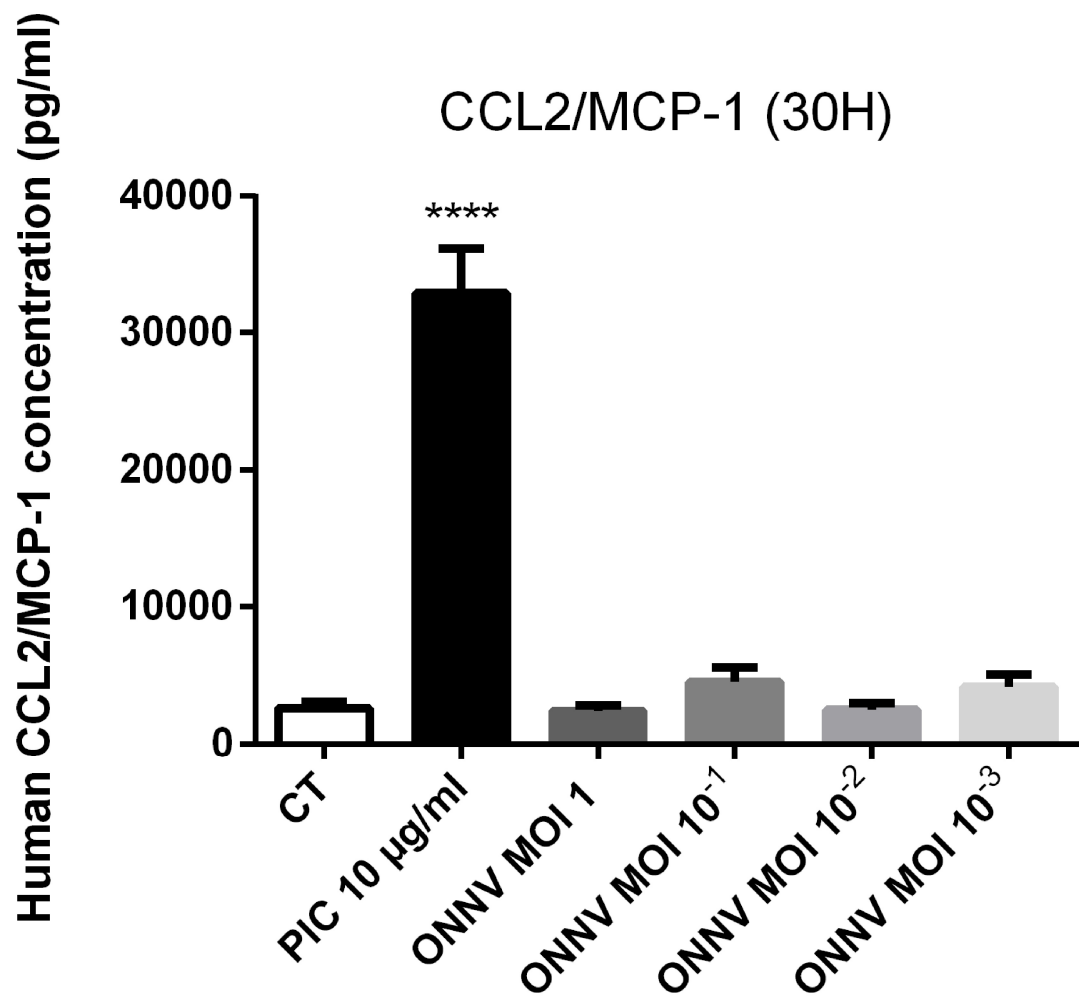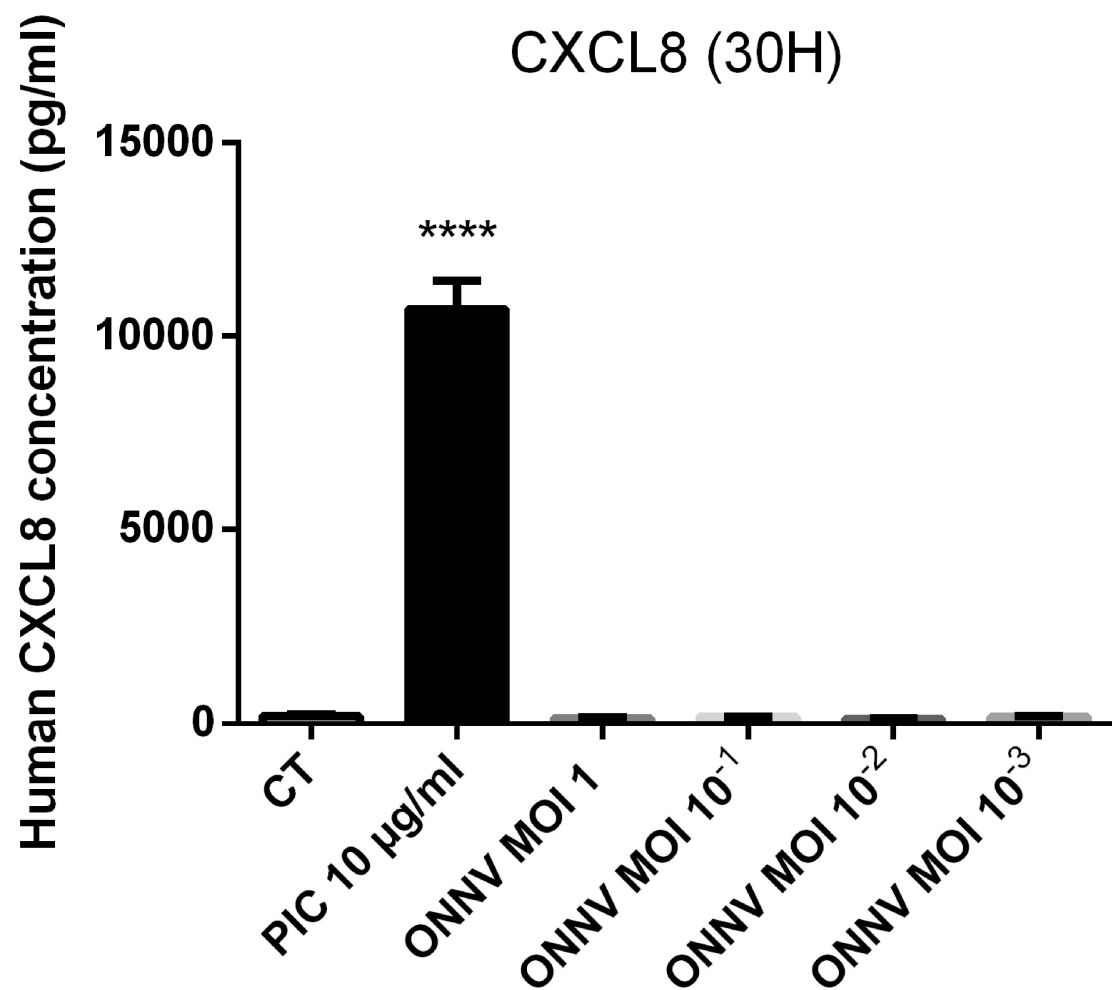

Supplement: s1 [file s1]

# Figure S5

a.

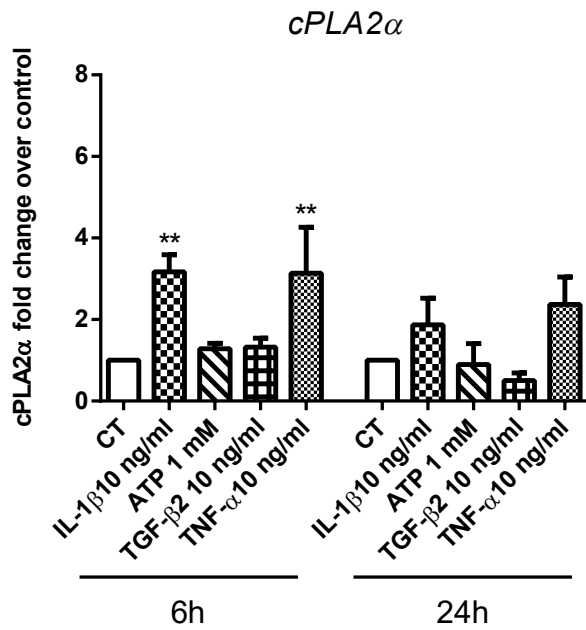

b.

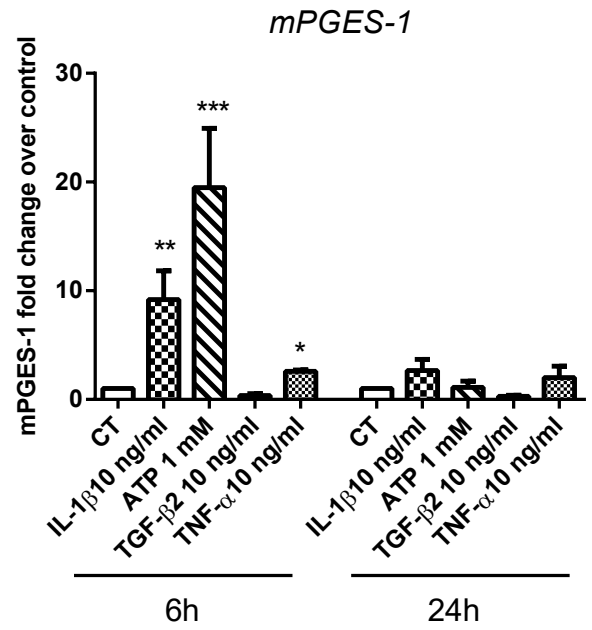

c.

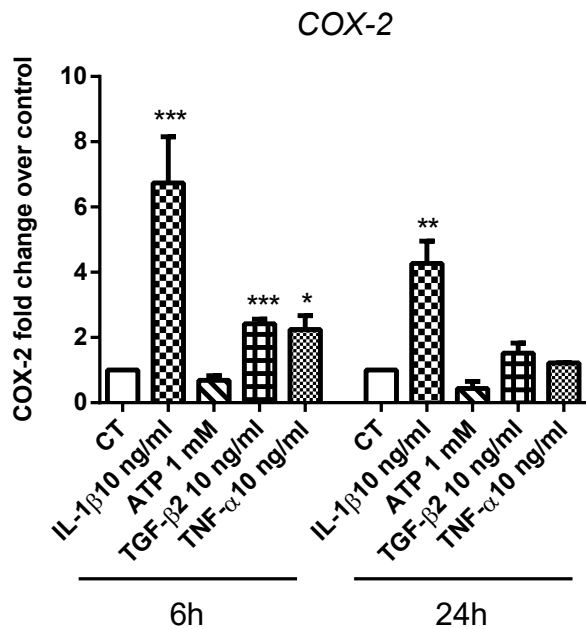

d.

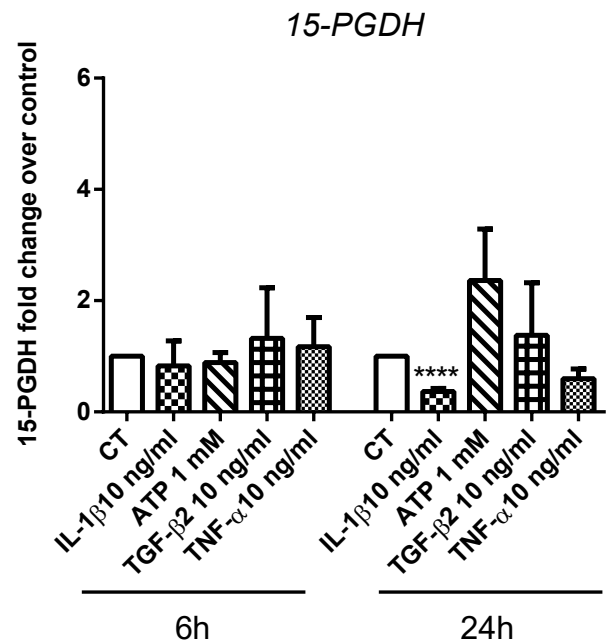

Supplement: s1 [file s1]

Figure S2

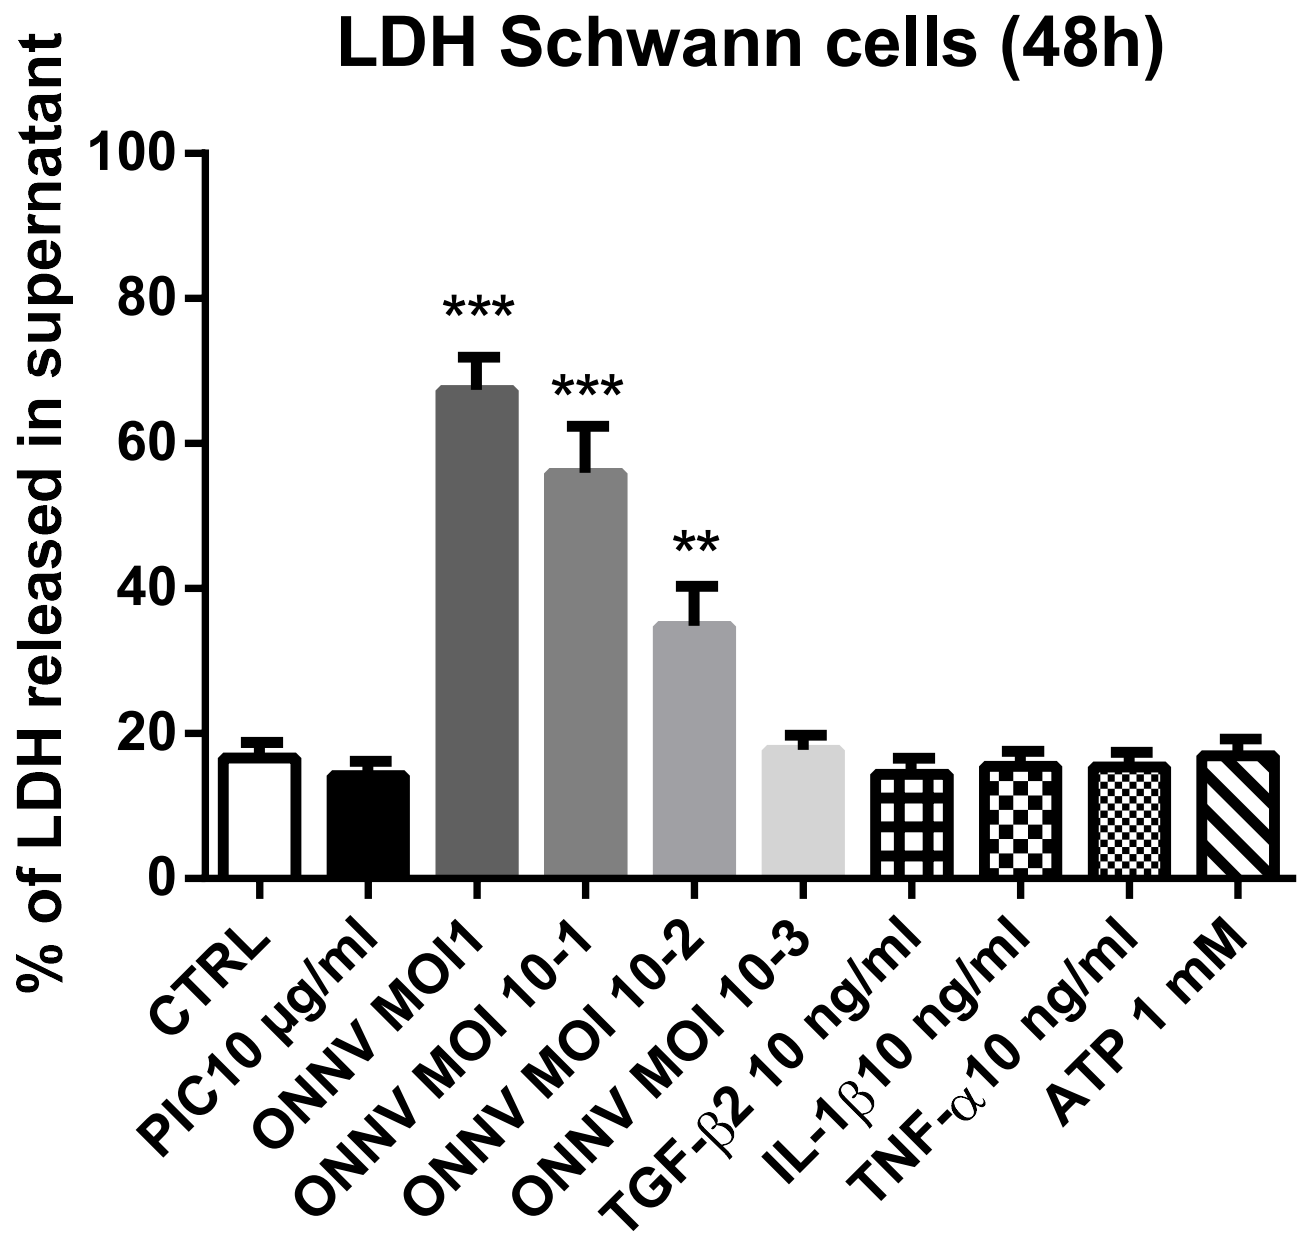

Supplement: s1 [file s1]
